# 1 Parasite histones mediate leak and coagulopathy in cerebral malaria

2

3 Christopher A Moxon<sup>1,2\*†</sup>, Yasir Alhamdi<sup>1†</sup>, Janet Storm<sup>3</sup>, Julien MH Toh<sup>4</sup>, Joo Yeon Ko<sup>5</sup>,  
4 George Murphy<sup>6</sup>, Terrie E Taylor<sup>7,8</sup>, Karl B Seydel<sup>5,6</sup>, Sam Kampondeni<sup>9</sup>, Michael Potchen<sup>10</sup>,  
5 James S. O'Donnell<sup>11</sup>, Niamh O'Regan<sup>11</sup>, Guozheng Wang<sup>1</sup>, Guillermo García-Cardena<sup>12</sup>,  
6 Malcolm Molyneux<sup>3,13</sup>, Alister Craig<sup>3</sup>, Simon T Abrams<sup>1‡</sup>, Cheng-Hock Toh<sup>1‡</sup>

7

## 8 **Affiliations:**

9 <sup>1</sup>Institute of Infection and Global Health, University of Liverpool, UK

10 <sup>2</sup>Wellcome Centre for Integrative Parasitology, Institute of Infection, Immunity  
11 and Inflammation, College of Medical Veterinary & Life Sciences, University of Glasgow, UK

12 <sup>3</sup>Liverpool School of Tropical Medicine, Liverpool, UK

13 <sup>4</sup>University of Sheffield Medical School, UK

14 <sup>5</sup>Department of Dermatology, Hanyang University Hospital and Hanyang University College  
15 of Medicine, Seoul, South Korea

16 <sup>6</sup>Program in Dermatopathology, Department of Pathology, Brigham and Women's Hospital,  
17 Harvard Medical School, Boston, MA, USA

18 <sup>7</sup>College of Osteopathic Medicine, Michigan State University, East Lansing, USA

19 <sup>8</sup>Blantyre Malaria Project, University of Malawi College of Medicine, Blantyre, Malawi

20 <sup>9</sup>University of Malawi College of Medicine, Blantyre, Malawi

21 <sup>10</sup>Univeristy of Rochester, Department of Radiology, Rochester, NY, USA

22 <sup>11</sup>Irish Centre for Vascular Biology, Royal College of Surgeons in Ireland, Dublin, Ireland.

23 <sup>12</sup>Center for Excellence in Vascular Biology, Department of Pathology, Brigham and  
24 Women's Hospital and Harvard Medical School, Boston, MA, USA

25 <sup>13</sup>Malawi-Liverpool-Wellcome Clinical Research Programme, University of Malawi College of  
26 Medicine, Blantyre, Malawi

27

28 \*To whom correspondence should be addressed: [christopher.moxon@glasgow.ac.uk](mailto:christopher.moxon@glasgow.ac.uk)

29 †These authors contributed equally to this work, ‡These authors contributed equally to this  
30 work

31

32 Short Title: Histones in cerebral malaria

33

34

35 Keywords: Malaria, Severe, Cerebral, Endothelium, coagulation, brain, swelling, blood brain  
36 barrier, histones

37

38

39

40

41

42

43 **Abstract:** Coagulopathy and leak, specific to the brain vasculature, are central pathogenetic  
44 components of cerebral malaria (CM). It is unclear how the parasite, *Plasmodium falciparum*,  
45 triggers these processes. Extracellular histones, released from damaged host cells, bind to cell  
46 membranes and cause coagulation activation, platelet aggregation and vascular leak in  
47 diverse critical illnesses. In CM patients with *P. falciparum*, serum histones correlate with  
48 fibrin formation, thrombocytopenia, and endothelial activation and predict brain swelling on  
49 magnetic resonance imaging and fatal outcome. Post-mortem, histones bind to the luminal  
50 vascular surface, co-localizing with *P. falciparum*-infected erythrocytes (IE), and with  
51 thrombosis and leak. Purified *P. falciparum* histones cause toxicity and barrier disruption in  
52 cultured human brain microvascular endothelial cells, as does serum from CM patients,  
53 reversed by anti-histone antibodies and non-anticoagulant heparin. These data implicate  
54 parasite histones as a key trigger of fatal brain swelling in CM. Neutralizing histones with  
55 agents such as non-anticoagulant heparin warrant exploration to prevent brain swelling and  
56 improve outcome.

57  
58  
59  
60  
61  
62  
63  
64  
65  
66  
67  
68  
69  
70  
71  
72  
73  
74  
75  
76  
77  
78  
79  
80  
81  
82  
83  
84  
85  
86  
87

## 88 Introduction

89 Cerebral malaria (CM) is a severe complication of *Plasmodium falciparum* infection. Despite  
90 effective antimalarial drugs, 10-20% of children developing CM die (1), contributing to  
91 400,000 malarial deaths per year, mostly in children in sub-Saharan Africa (2). Recent MRI  
92 studies implicate blood brain barrier (BBB) breakdown and brain swelling in the causal  
93 pathway to death (3, 4). Death typically occurs in the first 24 hours after admission (5), with  
94 children who do not reach critical levels of brain swelling frequently recovering rapidly. BBB  
95 stabilization, through targeting causal pathways to vascular leak in the brain, could halt this  
96 brain swelling and reduce mortality.

97  
98 A defining feature of CM is cytoadherence of *P. falciparum* infected erythrocytes (IE) to  
99 endothelial cells (EC) and sequestration in the microvasculature (1). *In vivo* retinal imaging (6,  
100 7), post-mortem histology (8, 9) and *in vitro* data (10) demonstrate spatial-temporal links  
101 between sequestration and microvascular leak and thrombosis, and coagulopathy predicts  
102 fatal outcome in CM (11, 12). Post-mortem studies in African children demonstrate  
103 sequestration in multiple organs, whereas leak and coagulopathy are most prominent in the  
104 brain (9, 13, 14); implying that sequestration provides a parasite stimulus for vascular leak  
105 and coagulopathy and that the response to this stimulus is different in the brain (8, 15). The  
106 nature of this parasite stimulus remains unclear.

107  
108 Extracellular histones, released by damaged or immune activated host cells have emerged as  
109 critical EC damage mediators in diverse severe illnesses including sepsis (16), inflammatory  
110 conditions (17) and trauma (18). Hallmark features of histone toxicity are thrombocytopenia  
111 (19) and microvascular thrombosis and leak (16, 18). In patients with sepsis or trauma, histone  
112 levels correlate with clinical severity scores (20), thrombocytopenia (19), coagulation  
113 activation (18, 20, 21) and predict outcome (22). In animal models of sepsis or trauma, the  
114 release of extracellular histones are causal in these processes and in fatal outcome, which are  
115 prevented by anti-histone antibodies (18, 20, 23), heparins, including non-anticoagulant  
116 heparins (24) (which neutralize histones) and by activated protein C (aPC, which degrades  
117 histones) (16). In mice, infusion of exogenous histones of >30mg/kg are toxic and of >60mg/kg  
118 are fatal; histologically histones are observed to bind to the endothelium, associated with  
119 microvascular coagulopathy and vascular leak (22). *In vitro*, histone binding to the EC  
120 membrane causes toxicity and barrier disruption (22, 23). The cationic domain of histones  
121 also induces Weibel Palade body exocytosis, endothelial activation and thrombocytopenia  
122 through platelet aggregation on von Willebrand Factor strings (25). Histones further induce a  
123 procoagulant phenotype through upregulation of endothelial tissue factor (26). By an  
124 unknown mechanism, histones decrease cell surface thrombomodulin *in vitro* (27), and  
125 induce thrombomodulin shedding *in vivo* (18).

126  
127 Given the striking similarities between the vascular leak, coagulopathy and thrombocytopenia  
128 induced by histones in other conditions (16, 22) and those at sites of sequestration in CM, in

129 particular the brain (8, 9, 14), we hypothesized that histones might be an important causal  
130 factor in CM pathogenesis. *P. falciparum*, as mammalian cells, contains histones (H2A, H2A.Z,  
131 H2B, H3, H4), packaged in nucleosomes with DNA. Following sequestration, intraerythrocytic  
132 merozoites multiply 16-24 times to form a schizont, increasing nuclear material, including  
133 histones, by an order of magnitude. Schizonts rupture releasing their contents, extruding *P.*  
134 *falciparum* histones *in vitro* into culture medium (28). Similar to mammalian histones, on  
135 cultured ECs, purified plasmodial histones cause inflammatory pathway activation, toxicity  
136 and barrier disruption (28). Therefore, histones may link sequestration and vascular  
137 pathology in CM; sequestration bringing histone-packed schizonts in contact with the  
138 endothelial surface, concentrating exposure to extruded histones many fold. The brain might  
139 be particularly vulnerable to this mechanism. Firstly, there are high levels of sequestration in  
140 the brain in CM (14, 29, 30). Secondly the brain may have reduced capacity to breakdown  
141 histones: the human brain has reduced innate capacity to produce activated protein C (aPC)  
142 (31), owing to low constitutive thrombomodulin and endothelial protein C receptor (EPCR)  
143 expression (32, 33), the receptors involved in aPC production. Moreover, parasite variants  
144 associated with the development of CM utilize EPCR as a binding receptor (34, 35), interfering  
145 with its function and the production of aPC (35, 36). Thus histones released by IE would be  
146 predicted to concentrate and be particularly toxic in the brain.

147  
148 Supporting that *P. falciparum* histones may be released in patients with malaria, nucleosomes  
149 have been detected in the plasma of South-East Asian adults with malaria, which were higher  
150 in severe cases (28). However the association between nucleosomes (which have minimal  
151 toxicity (21)) and free histones is variable and it was not identified whether these  
152 nucleosomes were of host or parasite origin, or whether they were active. Thus, it remains  
153 uncertain whether significant levels of parasite histones are produced *in vivo* in patients with  
154 malaria and there are no data assessing the association between histones and clinical or  
155 laboratory indicators of severity or coagulation and leak, nor data to assess whether  
156 plasmodial histones bind in the vasculature at sites of sequestration.

157  
158 Here we address these gaps. Using detailed laboratory, clinical and MRI imaging data we link  
159 histone levels in the blood to fibrin formation, endothelial activation and thrombocytopenia  
160 and to brain swelling and fatal outcome. Through post-mortem brain tissue samples from CM  
161 cases we show marked correlation between sequestration and the deposition of histones on  
162 the endothelial surface, and co-localisation with thrombosis and leak in the brain vasculature.  
163 We then demonstrate a causal role of *P. falciparum* histones in these processes through *ex*  
164 *vivo* experiments.

## 165 166 **Methods**

### 167 *Patients and blood samples*

168 Children aged 6 months – 16 years were recruited at Queen Elizabeth Central Hospital,  
169 Blantyre Malawi between January 2010 and August 2011. Inclusion criteria are described

170 previously (8). Children who met WHO criteria for CM underwent funduscopic examination  
171 by an ophthalmologist: characteristic retinal changes indicate sequestration of IE in the  
172 brain(37) and distinguish retinopathy-positive CM with stringently defined CM (CM-pos) from  
173 cases with retinopathy negative CM (CM-neg), who are more likely to have an alternative  
174 diagnosis (1), to which malaria makes a variable contribution (38) and thus may have a  
175 different coma aetiology. Venous blood was collected at admission into plain or sodium  
176 citrate tubes and serum and plasma prepared as previously described(39), stored at -80°C  
177 until assays were performed. Circulating histone levels were quantified by a custom  
178 immunoblot assay (18-20) and Osteoprotegrin, Fibrin monomers, F1+2 fragment by ELISA as  
179 described previously (8, 11, 40).

180

#### 181 *MRI scans and scoring of brain swelling*

182 MRI images were acquired using a 0.35-Tesla Signa Ovation Excite MRI scanner (General  
183 Electric). Images were scored independently by two radiologists who were blinded to  
184 patient disease group and outcome. A score from 1 – 8 was assigned to each scan, based on  
185 cerebral hemisphere swelling, using pre-specified criteria – described previously (3). We  
186 divided patients into 4 groups on the basis of this 8-point score: Score 1- 3, No brain  
187 swelling; 4-5, mild brain swelling; 6, moderate brain swelling and 7-8, severe brain swelling.  
188 A number of children did not have MRI scans. When this was because they recovered from  
189 coma within 12 hours we deemed it likely that they did not have significant brain swelling  
190 and included them in category 1. Other MRI scans were not performed for several reasons  
191 (e.g. patient clinical unstable, equipment issues), we could not reasonably assign a category,  
192 and missing data were handled by listwise deletion.

193

#### 194 *Isolation and purification of *P. falciparum* histones*

195 ITG mature IE were lysed with saponin and *P. falciparum* histones (H2A, H2B, H3, H4) purified  
196 using a Kit (Active Motif). Protein concentrations were determined by Biorad Protein Assay,  
197 using bovine serum albumin and purified calf histones (Roche) standards and purity examined  
198 by SDS-PAGE and Coomassie staining (>95% pure; Fig. S3)

#### 199 *Mass spectrometry sample preparation*

200 Purified *P. falciparum* and human histones (New England Biolabs) (6µg), normal serum,  
201 histone spiked serum and CM patient serum were separated by 15% SDS-PAGE and stained  
202 with Coomassie brilliant blue. The excised gel slices (<35kDa) from SDS-PAGE, were cut into  
203 1mm<sup>3</sup> plugs, transferred to a microtube and fully de-stained using 25mM Ambic alternately  
204 with Ambic/MeCN (2:1). Cysteine reduction was performed by adding 100µL DTT solution  
205 (1.5mg/mL) and incubated at 60°C for 60 min. Samples were centrifuged and the supernatant  
206 was discarded. Alkylation was performed by the addition of 100µL iodoacetamide (10mg/mL)  
207 for 45 min (protected from light). Samples were centrifuged and the supernatant discarded.  
208 Gel plugs were then washed with Ambic (25mM) for 15min at 37°C. To fully dehydrate the gel  
209 plugs, samples were washed with MeCN. In-gel digestion was performed by adding 100µL of

210 trypsin (12.5ng/ $\mu$ L in 25mM Ambic) to each sample with overnight incubation at 37°C, and  
211 reactions terminated by the addition of 10 $\mu$ L formic acid (1% final concentration). The  
212 solutions surrounding the gel plugs (containing the tryptic peptides) were retained for  
213 analysis. To extract additional peptides from the gel plugs, a further incubation with a solution  
214 containing water:MeCN:FA (50:49:1) and then MeCN:FA (80:19:1) was performed. Finally,  
215 solutions were pooled and dried to a 10 $\mu$ L solution.

216

#### 217 *Liquid Chromatography-mass spectrometry analysis*

218 Analysis was performed using an Ultimate 3000 RSLC™ nano system (Thermo Scientific,  
219 Hemel Hempstead), coupled to a QExactive-Hf™ mass spectrometer (Thermo Scientific).  
220 Samples were loaded onto a trapping column (Thermo Scientific, PepMap100, C18, 300  $\mu$ m X  
221 5 mm), using partial loop injection, for seven minutes at a flow rate of 9  $\mu$ L/min with 0.1%  
222 (v/v) FA. Samples were then resolved on the analytical column (Easy-Spray C18 75  $\mu$ m x 500  
223 mm 2  $\mu$ m column) using a gradient of 97% A (0.1% formic acid) 3% B (99.9% ACN 0.1% formic  
224 acid) to 60% A 40% B over 15 min at a flow rate of 300 nL min<sup>-1</sup>. The data-dependent program  
225 used for data acquisition consisted of a 70,000 resolution full-scan MS scan (AGC set to 1 x  
226 10<sup>6</sup> ions, with a maximum fill time of 20ms) the 10 most abundant peaks were selected for  
227 MS/MS using a 35,000 resolution scan (AGC set to 1 x 10<sup>5</sup> ions with a maximum fill time of  
228 100ms) with an ion-selection window of 3 m/z and a normalized collision energy of 28. To  
229 avoid repeated selection of peptides for MS/MS the program used a 15 second dynamic  
230 exclusion window. Sequence alignment was performed in PEAKs software (v8.5) against both  
231 *P. falciparum* and *Homo sapiens* databases. Once species-specific peptides were identified  
232 they were further verified using Skyline analysis software for quantification (comparisons  
233 between the specific amino acid sequences of *P. falciparum* and *Homo sapiens* histone  
234 proteins illustrated in Fig S4).

235

#### 236 *Immunohistochemistry*

237 Brain tissue samples of parietal cortex were collected at autopsy from Malawian children  
238 dying with encephalopathic illness and were formalin fixed and paraffin embedded as  
239 described previously (9). Based on clinical information and autopsy findings the cause of  
240 death was determined for each case by a clinical pathologist. We used samples classified into  
241 one of 3 overall categories as defined previously (1): 1) Definitive CM (CM1 and CM2) –  
242 children who met the case definition for CM during life and who at death had sequestration  
243 of IE in cerebral vessels and in whom no alternative cause of death was identified at autopsy;  
244 2) 'Faux CM' (CM3) – met the case definition for CM during life but who had no visible  
245 sequestration of IE in cerebral vessels and in whom at autopsy another cause of coma and  
246 death was identified in all cases; 3) Aparasitemic non-malarial coma comatose patients who  
247 had no detectible malaria parasites in blood or tissue.

248

249 Cortical sections (4 $\mu$ m in thickness) were stained for histones and fibrinogen. Heat-induced  
250 antigen retrieval in citrate buffer (pH 6.0) was performed prior to incubation with primary



251 antibodies: anti-histone H3 (Abcam); anti-Fibrinogen (ThermoFisher)). Bound primary  
252 antibody was detected with an immunoperoxidase kit (EnVision Plus; Dako). Negative  
253 controls without primary antibody were used for all samples to confirm specificity.  
254 Immunohistochemistry was performed on all cases by a single investigator blinded to  
255 histologic diagnosis. Slides were scored by 3 investigators blinded to histological classification.  
256 70 random vessels were scored from each slide. IE sequestration for each vessel was scored  
257 as: negative (0); positive but <50% of the vessel lumen (+) or >50% of the vessel lumen (++)  
258 Histone membrane staining for each vessel was scored as absent (0); weak (+) or strong (++)  
259 Fibrinogen extravasation as a marker of leak was scored for each vessel as absent or present.

260

#### 261 *Endothelial cell culture, endothelial cell damage assays and barrier function assays*

262 Primary HBMEC (Cell Systems, US) were cultured in 1% gelatin-coated flasks, in Complete  
263 Medium containing 10% FBS (Cell Systems, US) as per manufacturer's instructions.

264

265 For toxicity assays, HBMEC were treated with either purified histones in Cell Systems media  
266 with 2% serum or serum from healthy controls or patients for 1 hour at 37°C, under 5% CO<sub>2</sub>.  
267 Cell viability was determined by propidium iodide (PI) staining and quantified using flow  
268 cytometry. Cell toxicity in patient samples was calculated as the percentage of cells that were  
269 PI positive, subtracting the percentage of PI positive cells from the healthy donors from each  
270 sample. For anti-histone treatments, patient sera were pre-incubated for 10mins with anti-  
271 histone single-chain variable fragment (ahscFv; 200 µg/ml, synthesis described previously  
272 (18)) or with non-anticoagulant N-acetyl heparin (200 µg/ml; Sigma).

273

274 Transmembrane permeability of confluent HBMEC was analysed in a dual-chamber system  
275 (0.4 µm pore size; Millipore). HBMEC were treated with normal serum or patient serum for  
276 1hr, replaced with horse radish peroxidase (HRP)-containing media. Leaked HRP over 1hr was  
277 determined using TMB substrate (ThermoFisher) on a microplate reader (450nm).  
278 Permeability was expressed as a fold change compared to monolayers treated with pooled  
279 normal serum from healthy UK donors [RETH000685].

280

#### 281 *In vitro platelet aggregation*

282 Platelets (2x10<sup>3</sup>/µl) prepared from healthy donors were mixed with pooled plasma spiked  
283 with malarial histones. Platelet aggregation was determined optically at 405nm (Multiskan  
284 Spectrum plate reader, ThermoScientific) in a 96-well plate, over 15mins at 37°C. To  
285 normalize for differences in optical density between plasma samples each sample was  
286 blanked with plasma in the absence of platelets, allowing the specific changes in optical  
287 density induced by platelet aggregation to be determined.

288

#### 289 *Statistical analysis*

290 Statistical analyses were performed using Stata (version 11; Statacorp) and Prism (version 5;  
291 GraphPad) software. Continuous variables were assumed to have normal or log normal

292 distribution depending on their level of skewness. Differences between groups were  
293 compared using linear regression models. To adjust for multiple comparisons we used the  
294 Tukey (when comparing all groups to each other) or Dunnett tests (when comparing all groups  
295 to a control group). The association between histone levels and other variables was assessed  
296 by linear regression and expressed as correlation coefficients. For ordered categorical slide  
297 scoring data, the associations between histological classification, extent of sequestration and  
298 degree of fibrinogen extravasation were assessed by use of ordinal logistic regression models,  
299 controlling for clustering within cases and adjusting for any differences between scorers. All  
300 tests were two-tailed with a conventional 5% alpha-level.

301

## 302 **Results**

303 *Circulating concentrations of extracellular histones are elevated in cerebral malaria cases and*  
304 *levels correlate with the degree of fibrin generation and with endothelial activation*

305 Clinical characteristics of the patients are detailed in Table 1. Compared with CM-pos, CM-  
306 neg patients had a higher haemoglobin and platelet count and lower lactate level and parasite  
307 count. To explore whether histones are released *in vivo* and whether levels were associated  
308 with diagnosis, we measured circulating histones in serum samples taken from patients on  
309 admission. Histone concentrations were markedly higher in children with CM-pos than in  
310 children with CM-neg, non-CM encephalopathy, uncomplicated malaria, non-severe febrile  
311 illness or healthy controls (Fig 1A). These differences were not explained merely by an  
312 association with parasite density as there was only weak correlation between extracellular  
313 histone levels and peripheral parasite density ( $r=0.22$   $p=0.0044$ , Fig 1B) and there was no  
314 correlation between histone and histidine rich protein 2 levels (PfHRP2, a released parasite  
315 protein used as a marker of biomass [ $r=0.09$ ,  $p=0.25$ ]).

316

317 To explore histones as a possible trigger for coagulation activation in CM we assessed the  
318 association between circulating histones and markers of *in vivo* fibrin formation and  
319 coagulation activation (11). In CM-pos cases, plasma fibrin monomer concentrations  
320 correlated with circulating histone levels ( $r=0.56$ ;  $p<0.001$ , Fig 1C) more strongly than with  
321 (log) peripheral parasite density ( $r=0.34$ ,  $p<0.001$ ), PfHRP2 ( $r=0.24$ ,  $p=0.013$ ), platelets ( $r=-$   
322  $0.18$ ,  $p=0.2$ ), lactate ( $r=0.33$ ,  $p<0.001$ ), blood glucose ( $r=0.08$   $p=0.58$ ) or haemoglobin  
323 ( $r=0.06$ ,  $p=0.89$ ). Circulating histone levels showed a moderate correlation with prothrombin  
324 fragment F1+2 (a marker of thrombin generation ( $r=0.34$ ,  $p<0.001$ ; Fig 1D)). Hence  
325 circulating histones better predict fibrin generation and coagulation activation than parasite  
326 density or other markers of disease severity.

327

328 Histones cause Weibel Palade Body (WBP) exocytosis and thrombocytopenia in mice through  
329 endothelial activation and increased platelet adhesion (25). Here circulating histone  
330 concentration correlated negatively with platelet levels, weakly in the subgroup of children  
331 with retinopathy positive CM ( $r=-0.22$ ,  $p=0.0039$  [in whom thrombocytopenia was nearly  
332 universal]), but moderately when patients with retinopathy negative CM were also



333 considered ( $r = -0.41$ ,  $p < 0.001$ ; Fig 1E). Endothelial activation and WPB exocytosis are well  
334 established in CM including release of osteoprotegrin (OPG), which we have previously shown  
335 correlates with thrombocytopenia (40). Here circulating histone concentration correlated  
336 with plasma osteoprotegrin concentration ( $r = 0.54$ ,  $p < 0.001$ , Fig 1F). These data show a  
337 specific association between histones and CM-pos but not with CM-neg or aparasitaemic  
338 encephalopathy and suggest a link between extracellular histones and critical factors involved  
339 in clot formation and localization.

340

341 *Association between histone levels, brain swelling and fatal outcome.*

342 Given this association between histones and coagulopathy, a process implicated in brain  
343 swelling (41) and death (8, 42) in CM, we assessed the correlation between histone levels and  
344 fatal outcome and brain swelling. In children with CM-pos, the serum histone concentration  
345 was significantly higher in patients who died ( $n = 24$ ; geometric mean  $35.7 \mu\text{g/ml}$  [ $18.6$ – $68.6$   
346  $\mu\text{g/ml}$ ]; Fig 2A) than in patients who survived ( $n = 146$ ; geometric mean  $21.6 \mu\text{g/ml}$  [ $16.4$ –  
347  $28.6 \mu\text{g/ml}$ ];  $p = 0.04$ ).

348

349 In CM-pos cases histone levels were 3 times higher in children who had moderate brain  
350 swelling (geometric mean  $26.9 \mu\text{g/ml}$ ; 95% CI  $17.45 - 41.42$ ,  $p = 0.028$ ) or severe brain  
351 swelling ( $29.86 \mu\text{g/ml}$ ; 95% CI  $18.58 - 47.97$ ,  $p = 0.012$ ) than in children who had no evidence  
352 of brain swelling on MRI ( $8.79 \mu\text{g/ml}$ ; 95% CI  $3.09 - 25.01$ ) (Fig 2B). In comparison peripheral  
353 parasite density, PfHRP2, lactate, platelet levels, and osteoprotegrin levels were not  
354 significantly associated with brain swelling (Fig.S1). There was a significant association  
355 between platelet levels and swelling and lactate levels and swelling when a less stringent  
356 definition of CM was used (i.e. when both CM-pos and CM-neg cases were included, Figure  
357 S2), this wider inclusion also increased the strength of association for histones (Figure S2).  
358 Taken together these data indicate a strong association between histone levels and the  
359 degree of brain swelling over and above other laboratory factors associated with severity in  
360 CM.

361

362 *Detection of significant levels of P. falciparum histones in patient samples using mass*  
363 *spectrometry*

364 Owing to the highly conserved nature of histones, with >90% sequence homology between  
365 *Plasmodium* and human histones, available antibodies react with both human and  
366 *Plasmodium* histones (28). We developed a semi-quantitative mass spectrometry method  
367 (outlined in Figure 3A), to determine the proportion of parasitic and human histones within  
368 patient samples. Using *P. falciparum* histones purified from culture (Fig. S3), and pure human  
369 histones, we identified specific peptides for both H4 (Fig. 3B, C, Fig. S4) and H2A.Z (Fig. S4)  
370 that distinguished between *P. falciparum* and human histones (Fig. 3D, E). We then applied  
371 this method to serum samples from 10 children with CM-pos. *P. falciparum* and human  
372 histones were identified in all 10 CM cases, with *P. falciparum* histones constituting a mean  
373 of 51% (range 2% to 91%, Fig. 3F, G) of the total histone concentration.

374

375 *Accumulation of histones at the endothelial surface in the brain in fatal cases is associated*  
376 *with sequestration and with blood brain barrier breakdown*

377 Histone mediated barrier disruption is caused by histones binding to the endothelium,  
378 observed by histology in histone-infused mice (22). To explore whether extracellular histones  
379 bind to the endothelium in CM we performed immunostaining for histones in post-mortem  
380 brain samples from Malawian children (details of cases in Table S1). Compared with “faux  
381 CM” (CM3) cases (n=6, Fig 4A) or non-CM cases (n=5) luminal histone staining was more  
382 frequent and stronger in CM cases (CM1/2, n=15, Fig 4B). Quantifying this by scoring with  
383 observers blinded to diagnosis, strong membrane staining was markedly associated with  
384 definitive CM when compared with faux CM (odds ratio [OR] 2.6; 95% Confidence Interval [CI]  
385 1.7 – 3.9; p<0.001) or non-CM (OR 7.2; 95% CI 5.0 – 10.6; p<0.001; Fig 4C).

386

387 Among definitive CM cases there was a strong association between histone membrane  
388 staining and the presence of IE. This increased with more intense IE-sequestration: when  
389 sequestration was present but in less than 50% of the vessel (+) the OR of histone membrane  
390 staining being present was 5.2 (95% CI 2.8 – 9.7, p<0.001; Fig 4D); when greater than 50% of  
391 the vessel contained sequestered IE (++) the OR for the presence of histone staining was 16.9  
392 (95% CI 9.2 – 31.3; p<0.001).

393

394 Histone staining was also strongly correlated with areas of BBB breakdown, demonstrated by  
395 staining for fibrinogen extravasation (Fig 4E): weak histone staining was associated with an  
396 OR of 2.8 for the presence of fibrinogen extravasation (95% CI 1.6 – 5.0; p<0.001, 4F) and  
397 strong histone staining with an OR of 4.5 for fibrinogen extravasation (95% CI 1.8 – 11.4;  
398 p=0.001), as shown in fig.4H as “% of vessels with leak”. Histone staining was also observed  
399 to co-localize with thrombi (Fig 4G) and with ring hemorrhages (Fig 4H).

400

401 *Purified P. falciparum histones and serum from CM cases induce endothelial damage and*  
402 *barrier disruption*

403 Mammalian histones directly induce endothelial cell membrane damage and barrier  
404 disruption on human vein umbilical vein EC (16, 18) and *P. falciparum* histones induce damage  
405 in dermal and lung EC (28). To investigate the potential relevance of this in the brain, we  
406 tested whether purified *P. falciparum* histones cause cell damage and leak on primary human  
407 brain microvascular EC (HBMEC). *P. falciparum* histones induced significant cellular toxicity  
408 (n=3 for each condition, Fig. 5A, B) similar to the effects seen with mammalian histones (16,  
409 18). To demonstrate that this effect was specifically induced by histones, and not a  
410 contaminant, we used an anti-histone single-chain Fragment variable (ahscFv), previously  
411 shown to inhibit histone toxicity (18, 43). ahscFV abrogated histone-induced toxicity (Fig. 5A).  
412 Non-anti-coagulant heparin, a potential treatment with minimal toxicity that prevents toxicity  
413 of mammalian histones (24), also prevented *P. falciparum* histone toxicity on HBMEC (Fig.  
414 5A).

415

416 To investigate whether circulating histones from patients induce membrane toxicity, we  
417 incubated patient serum with HBMEC. Serum from CM-pos cases with elevated histones  
418 (histone concentration >100ug/ml; n=5) induced significant cellular toxicity, whereas serum  
419 from CM-pos cases without substantially elevated histones levels (histone concentration  
420 <25ug/ml) did not (n=3), nor did samples from children with uncomplicated malaria (n=3),  
421 mild non-malarial febrile illness (n=3), non-malarial encephalopathy (n=3) or retinopathy  
422 negative CM (n=3; Figure 5B). Serum-induced toxicity was abrogated by ahscFv treatment,  
423 supporting a causal link with histones in the serum (Fig. 5A, B).

424

425 We next investigated the effect of purified *P. falciparum* histones and patient serum on  
426 barrier integrity. Similar to human histones, *P. falciparum* histones induced rapid barrier  
427 disruption in HBMEC. This leak was reversed by ahscFv (Fig S5). Similarly, serum from CM-pos  
428 cases with high histone levels (n=3) induced leak, but serum from CM-neg cases and other  
429 control groups (all n=3) did not. Leak in the CM-pos cases was abrogated by ahscFV, also  
430 supporting that histones in the serum were causal in this leak (Fig. 5C).

431

432 Given the correlation between histones and thrombocytopenia in CM (Fig. 1E) we  
433 investigated whether *P. falciparum* histones also cause platelet aggregation. Incubation of  
434 purified *P. falciparum* histones with platelet rich plasma from normal healthy controls  
435 resulted in dose dependent platelet aggregation, inhibited with ahscFv treatment (Fig. 5D).

436

## 437 **Discussion**

438 A number of factors released from IE have been shown to cause endothelial damage or leak  
439 *in vitro* including glycosylphosphatidylinositol (44), extracellular vesicles (45), hemozoin and  
440 PfHRP2. IE-EC receptor-ligand interactions also cause endothelial perturbation (46-48). While  
441 it seems likely that CM pathogenesis constitutes a combination of interacting factors, rather  
442 than a single toxin or ligand (49, 50), we sought a factor that is necessary for CM vascular  
443 pathology and targetable with a safe and deployable treatment. Histones were a compelling  
444 candidate. Firstly because of the strong parallels between the clinicopathological features of  
445 histone-induced vascular pathology in other conditions and those in malaria. Secondly,  
446 because the sequestration of histone-packed IE in tissues would predict substantial  
447 concentration of histones being extruded to the endothelial surface. Thirdly because histones  
448 are a plausible target for an adjunctive therapy; treatments targeted against histones are  
449 protective in animal models of sepsis and trauma, even though extracellular histones are  
450 clearly not the sole factor contributing to pathogenesis in either of these conditions.

451

452 Our data provide evidence for histones as a necessary mediator of the vascular pathology in  
453 the brain in CM that link causal data from ex vivo experiments (patient serum directly causes  
454 leak and toxicity, which is reversed by blocking histones) to multi-model observations in a  
455 rigorously defined patient cohort. Correlation between histones levels, diagnosis, fatal

456 outcome, thrombocytopenia and fibrin production imply a role for histones in death and in  
457 key pathogenetic processes. Employing MRI scans and a grading system we established a  
458 correlation between serum histone levels and the level of brain swelling in children. We then  
459 showed that a significant proportion of histones were of parasite origin. Although human  
460 histones are also toxic, they are produced by diverse activated or damaged cells and might be  
461 a bystander event, triggered distant from sites of sequestration and vascular pathology. In  
462 contrast, parasite histones in the systemic circulation strongly suggest downstream detection  
463 of histones released from rupturing mature schizonts, in which histones are concentrated 16–  
464 24-fold, occurring almost exclusively in sequestered IE. Examination of histological staining in  
465 post-mortem CM brain samples supported this paradigm. Extracellular histones were bound  
466 to the EC membrane, more frequently in CM cases than controls and spatially associated with  
467 the presence of sequestered IE and with areas of fibrinogen leak and thrombosis.

468  
469 To confirm whether plasmodial histones might be causal in these pathogenetic events, we  
470 purified *P. falciparum* histones from parasites grown in culture and showed that they induced  
471 membrane damage and leak in primary HBMEC and platelet aggregation in platelets from  
472 healthy donors. These effects were prevented by specific ahscFv. Patient serum from CM  
473 cases with high levels of histones also induced EC membrane toxicity and leak. Both were  
474 blocked by pre-incubation with ahscFv, indicating that the effects were caused by active  
475 histones in serum. Heparins, including non-anticoagulant heparins have been shown to  
476 neutralize the effects of mammalian histones and may represent promising therapies. As a  
477 proof of concept, we showed that non-anticoagulant heparin prevented toxicity from *P.*  
478 *falciparum* histones. Taken together, these data show that *P. falciparum* histones are  
479 produced at significant levels *in vivo*, that they circulate in an active form, show a causal role  
480 for histones from patient serum samples *ex vivo* in processes leading to CM pathogenesis and  
481 provide multiple points of evidence supporting a role of histones in key disease processes in  
482 patients.

483  
484 The locations of plasmodial histone production and what we know about modifiers of histone  
485 response fit well with the non-uniform pattern of vascular involvement in CM, whereby  
486 coagulopathy and leak are localized to sites of IE sequestration and in particular to the brain.  
487 It is notable that the median concentration of histones in the serum in CM-pos cases was  
488 24.6µg/ ml, and that toxicity to HBMEC in our assay was only seen at histones concentrations  
489 of >50µg/ ml (similar to mammalian histones and to experiments using purified exogenous  
490 histone infusion in mice (16, 22, 28)). The implication being that in most patients with CM,  
491 histone levels in the circulation do not reach levels sufficient to cause systemic toxicity. This  
492 is in keeping with the observed clinical pattern of disease in CM in African children: deep coma  
493 and marked cerebral irritability, generally without multi-organ failure (14) or systemic  
494 coagulopathy (11). In contrast it seems highly plausible that *P. falciparum* histones  
495 concentrate several fold at sites of intense sequestration (Fig. 3B) and cross this toxic  
496 threshold. We hypothesize that the brain is particularly vulnerable to histone toxicity because

497 of reduced capacity to produce aPC. This would not be expected to manifest in conditions  
498 involving release of histones from immune-activated cells such as in sepsis and trauma, given  
499 that the brain is an immune-privileged site (51). The paradigm in CM is different; parasite  
500 histones reach high levels in the brain through IE sequestration. Moreover, IE sequestration  
501 in the brain may itself impair aPC production - firstly because IE reduce surface  
502 thrombomodulin and EPCR, putatively by receptor cleavage (8, 15). Secondly, parasite  
503 variants associated with the development of CM (expressing domain cassette 8 [DC8]) reduce  
504 aPC production, by binding to EPCR and inhibiting its activity (52). DC8 variants also show a  
505 tropism for brain endothelium (34, 52, 53). Hence parasites in CM patients may be more likely  
506 to concentrate plasmodial histones in the brain, through sequestration, and simultaneously  
507 may prevent their breakdown, through inhibiting aPC production. In support of this, DC8  
508 expressing variants are associated with both thrombocytopenia and brain swelling (48); aPC  
509 inhibition potentially increasing both histone-induced platelet aggregation and histone-  
510 induced endothelial leak. It is notable that histones are implicated in neurotoxicity and  
511 ischemic damage in neurodegenerative conditions and stroke, and that in animal models  
512 these effects are reversed by aPC (54-56).

513  
514 Our study has several limitations. Firstly, our study is in human patients. While generally a  
515 strength, this leads to marked heterogeneity, including in variables that might affect histone  
516 levels, such as length of illness and timing of antimalarial administration. Further we took  
517 blood from each patient at only one timepoint, representing a snapshot in a dynamic disease  
518 process. This precluded examination of the temporal association between histone levels and  
519 other variables. Secondly, while the association between histone binding and sequestration  
520 and the finding that 51% of histones in serum were of parasite origin are both highly  
521 suggestive of a parasite origin for luminal histones, we did not prove this. Nonetheless  
522 concentration of host histones at sites of IE sequestration would also be predicted to have  
523 similar effects and to respond to similar treatments.

524  
525 Given that a significant proportion of histones detected in blood are of parasite origin it is  
526 notable that histone levels do not correlate well with parasitemia or PfHRP2. This may reflect  
527 the limitations of each of these assays, used at a single time point, to determine total parasite  
528 biomass. Firstly, our main assay to determine histone levels does not distinguish human from  
529 parasite histones. Serum histone levels are likely to be a function of production, breakdown  
530 and luminal binding and hence it is unclear how accurately serum histone levels of either  
531 species correlate with total production. Secondly peripheral parasitemia is a poor predictor  
532 of total parasite biomass: sequestered IE do not circulate, and so the concentration of  
533 parasites detectable in the periphery fluctuates markedly depending on the stage of the  
534 majority of the parasites in an individual patient. Thirdly, PfHRP2, a soluble parasite factor,  
535 has a long half-life and therefore its concentration in serum is a function of parasite biomass  
536 and duration of infection. While PfHRP2 is a predictor of parasite biomass and correlates with  
537 disease severity in several populations (57, 58), among Malawian children with CM, serum

538 PfHRP2 levels do not correlate well with markers of severity (such as lactate or  
539 thrombocytopenia) or with outcome (59).

540

541 Further work is warranted to explore the biology and timing of plasmodial histone release  
542 and the mechanism of action of plasmodial histones in greater detail. A specific antibody  
543 against *P. falciparum* histone would be useful to differentiate *P. falciparum* histone levels in  
544 serum and in tissue. It remains to be determined whether agents that neutralize or degrade  
545 histones can reduce brain swelling during the critical 24 hours after hospital admission and  
546 thereby improve outcome in CM. Potential agents include aPC or heparin (24, 60, 61).  
547 Modified non-anticoagulant heparins are a rational first choice, particularly given their use in  
548 critically ill patients with a variety of inflammatory diseases (61) and in patients with sickle  
549 cell crisis (62). There is a planned phase II study in patients to use a modified heparin to  
550 reverse binding and rosetting in malaria. A different dosing regimen is likely to be needed to  
551 reverse the effects of histones than to block binding, which would require further  
552 investigation. However, the possibility that modified heparins could be synergistic in malaria  
553 – both reducing binding and neutralizing heparins – make the potential benefits more  
554 compelling. Finally, since cells in all eukaryotic organisms contain histones it will be important  
555 to explore whether parasite histones contribute to pathogenesis in other parasitic infections.

556

557

#### 558 **Supplementary Materials**

559 Fig. S1. Histones but not other laboratory factors are associated with the degree of brain  
560 swelling in CM-pos patients.

561 Fig. S2. When both CM-pos and CM-neg cases are included, histones platelet count and  
562 lactate are associated with the degree of brain swelling.

563 Fig. S3. Gel showing purified *Plasmodium falciparum* (P. f.) and human histones.

564 Fig. S4. Alignment of Homo sapiens and *P. falciparum* histones

565 Fig. S5. Time-course of barrier disruption of Primary human brain microvascular endothelial  
566 cells (HBMEC) by *P. falciparum* histones in a dual chamber system

567

568 Table S1. Summary of post-mortem cases

569

#### 570 **References**

571 1. Taylor TE, Fu WJ, Carr RA, Whitten RO, Mueller JS, Fosiko NG, et al. Differentiating  
572 the pathologies of cerebral malaria by postmortem parasite counts. Nat Med.  
573 2004;10(2):143-5.

574 2. WHO. World Malaria Report 2017. Geneva: World Health Organization; 2017 2017.

575 3. Seydel KB, Kampondeni SD, Valim C, Potchen MJ, Milner DA, Muwalo FW, et al. Brain  
576 swelling and death in children with cerebral malaria. The New England journal of medicine.  
577 2015;372(12):1126-37.

578 4. Mohanty S, Benjamin LA, Majhi M, Panda P, Kampondeni S, Sahu PK, et al. Magnetic  
579 Resonance Imaging of Cerebral Malaria Patients Reveals Distinct Pathogenetic Processes in  
580 Different Parts of the Brain. mSphere. 2017;2(3).



- 581 5. Dondorp AM, Fanello CI, Hendriksen IC, Gomes E, Seni A, Chhaganlal KD, et al.  
582 Artesunate versus quinine in the treatment of severe falciparum malaria in African children  
583 (AQUAMAT): an open-label, randomised trial. *Lancet*. 2010;376(9753):1647-57.
- 584 6. Barrera V, MacCormick IJC, Czanner G, Hiscott PS, White VA, Craig AG, et al.  
585 Neurovascular sequestration in paediatric *P. falciparum* malaria is visible clinically in the  
586 retina. *Elife*. 2018;7.
- 587 7. Zhao Y, MacCormick IJ, Parry DG, Leach S, Beare NA, Harding SP, et al. Automated  
588 detection of leakage in fluorescein angiography images with application to malarial  
589 retinopathy. *Sci Rep*. 2015;5:10425.
- 590 8. Moxon CA, Wassmer SC, Milner DA, Jr., Chisala NV, Taylor TE, Seydel KB, et al. Loss  
591 of endothelial protein C receptors links coagulation and inflammation to parasite  
592 sequestration in cerebral malaria in African children. *Blood*. 2013;122(5):842-51.
- 593 9. Dorovini-Zis K, Schmidt K, Huynh H, Fu W, Whitten RO, Milner D, et al. The  
594 neuropathology of fatal cerebral malaria in malawian children. *Am J Pathol*.  
595 2011;178(5):2146-58.
- 596 10. Francischetti IM, Seydel KB, Monteiro RQ, Whitten RO, Erexson CR, Noronha AL, et  
597 al. Plasmodium falciparum-infected erythrocytes induce tissue factor expression in  
598 endothelial cells and support the assembly of multimolecular coagulation complexes. *J*  
599 *Thromb Haemost*. 2007;5(1):155-65.
- 600 11. Moxon CA, Chisala NV, Mzikamanda R, MacCormick I, Harding S, Downey C, et al.  
601 Laboratory evidence of disseminated intravascular coagulation is associated with a fatal  
602 outcome in children with cerebral malaria despite an absence of clinically evident  
603 thrombosis or bleeding. *J Thromb Haemost*. 2015;13(9):1653-64.
- 604 12. Greiner J, Dorovini-Zis K, Taylor TE, Molyneux ME, Beare NA, Kamiza S, et al.  
605 Correlation of hemorrhage, axonal damage, and blood-tissue barrier disruption in brain and  
606 retina of Malawian children with fatal cerebral malaria. *Front Cell Infect Microbiol*.  
607 2015;5:18.
- 608 13. Haldar K, Murphy SC, Milner DA, Taylor TE. Malaria: mechanisms of erythrocytic  
609 infection and pathological correlates of severe disease. *Annu Rev Pathol*. 2007;2:217-49.
- 610 14. Milner DA, Jr., Whitten RO, Kamiza S, Carr R, Liomba G, Dzamalala C, et al. The  
611 systemic pathology of cerebral malaria in African children. *Front Cell Infect Microbiol*.  
612 2014;4:104.
- 613 15. Aird WC, Mosnier LO, Fairhurst RM. Plasmodium falciparum picks (on) EPCR. *Blood*.  
614 2013.
- 615 16. Xu J, Zhang X, Pelayo R, Monestier M, Ammollo CT, Semeraro F, et al. Extracellular  
616 histones are major mediators of death in sepsis. *Nature medicine*. 2009;15(11):1318-21.
- 617 17. Szatmary P, Huang W, Criddle D, Tepikin A, Sutton R. Biology, role and therapeutic  
618 potential of circulating histones in acute inflammatory disorders. *J Cell Mol Med*.  
619 2018;22(10):4617-29.
- 620 18. Abrams ST, Zhang N, Manson J, Liu T, Dart C, Baluwa F, et al. Circulating histones are  
621 mediators of trauma-associated lung injury. *Am J Respir Crit Care Med*. 2013;187(2):160-9.
- 622 19. Alhamdi Y, Abrams ST, Lane S, Wang G, Toh CH. Histone-Associated  
623 Thrombocytopenia in Patients Who Are Critically Ill. *JAMA*. 2016;315(8):817-9.
- 624 20. Alhamdi Y, Abrams ST, Cheng Z, Jing S, Su D, Liu Z, et al. Circulating Histones Are  
625 Major Mediators of Cardiac Injury in Patients With Sepsis. *Crit Care Med*. 2015;43(10):2094-  
626 103.

- 627 21. Abrams ST, Zhang N, Dart C, Wang SS, Thachil J, Guan Y, et al. Human CRP defends  
628 against the toxicity of circulating histones. *J Immunol.* 2013;191(5):2495-502.
- 629 22. Abrams ST, Zhang N, Manson J, Liu T, Dart C, Baluwa F, et al. Circulating histones are  
630 mediators of trauma-associated lung injury. *American journal of respiratory and critical care*  
631 *medicine.* 2013;187(2):160-9.
- 632 23. Alhamdi Y, Zi M, Abrams ST, Liu T, Su D, Welters I, et al. Circulating Histone  
633 Concentrations Differentially Affect the Predominance of Left or Right Ventricular  
634 Dysfunction in Critical Illness. *Crit Care Med.* 2015.
- 635 24. Wildhagen KC, Garcia de Frutos P, Reutelingsperger CP, Schrijver R, Areste C, Ortega-  
636 Gomez A, et al. Nonanticoagulant heparin prevents histone-mediated cytotoxicity in vitro  
637 and improves survival in sepsis. *Blood.* 2014;123(7):1098-101.
- 638 25. Michels A, Albanez S, Mewburn J, Nesbitt K, Gould TJ, Liaw PC, et al. Histones link  
639 inflammation and thrombosis through the induction of Weibel-Palade body exocytosis. *J*  
640 *Thromb Haemost.* 2016;14(11):2274-86.
- 641 26. Yang X, Li L, Liu J, Lv B, Chen F. Extracellular histones induce tissue factor expression  
642 in vascular endothelial cells via TLR and activation of NF-kappaB and AP-1. *Thromb Res.*  
643 2016;137:211-8.
- 644 27. Kim JE, Yoo HJ, Gu JY, Kim HK. Histones Induce the Procoagulant Phenotype of  
645 Endothelial Cells through Tissue Factor Up-Regulation and Thrombomodulin Down-  
646 Regulation. *PLoS One.* 2016;11(6):e0156763.
- 647 28. Gillrie MR, Lee K, Gowda DC, Davis SP, Monestier M, Cui L, et al. Plasmodium  
648 falciparum histones induce endothelial proinflammatory response and barrier dysfunction.  
649 *The American journal of pathology.* 2012;180(3):1028-39.
- 650 29. Seydel KB, Milner DA, Jr., Kamiza SB, Molyneux ME, Taylor TE. The distribution and  
651 intensity of parasite sequestration in comatose Malawian children. *J Infect Dis.*  
652 2006;194(2):208-5.
- 653 30. Turner GD, Morrison H, Jones M, Davis TM, Looareesuwan S, Buley ID, et al. An  
654 immunohistochemical study of the pathology of fatal malaria. Evidence for widespread  
655 endothelial activation and a potential role for intercellular adhesion molecule-1 in cerebral  
656 sequestration. *Am J Pathol.* 1994;145(5):1057-69.
- 657 31. Macko RF, Killewich LA, Fernandez JA, Cox DK, Gruber A, Griffin JH. Brain-specific  
658 protein C activation during carotid artery occlusion in humans. *Stroke; a journal of cerebral*  
659 *circulation.* 1999;30(3):542-5.
- 660 32. Ishii H, Salem HH, Bell CE, Laposata EA, Majerus PW. Thrombomodulin, an  
661 endothelial anticoagulant protein, is absent from the human brain. *Blood.* 1986;67(2):362-5.
- 662 33. Laszik Z, Mitro A, Taylor FB, Jr., Ferrell G, Esmon CT. Human protein C receptor is  
663 present primarily on endothelium of large blood vessels: implications for the control of the  
664 protein C pathway. *Circulation.* 1997;96(10):3633-40.
- 665 34. Claessens A, Adams Y, Ghumra A, Lindergard G, Buchan CC, Andisi C, et al. A subset  
666 of group A-like var genes encodes the malaria parasite ligands for binding to human brain  
667 endothelial cells. *Proc Natl Acad Sci U S A.* 2012;109(26):E1772-81.
- 668 35. Turner L, Lavstsen T, Berger SS, Wang CW, Petersen JE, Avril M, et al. Severe malaria  
669 is associated with parasite binding to endothelial protein C receptor. *Nature.*  
670 2013;498(7455):502-5.
- 671 36. Petersen JE, Bouwens EA, Tamayo I, Turner L, Wang CW, Stins M, et al. Protein C  
672 system defects inflicted by the malaria parasite protein PfEMP1 can be overcome by a  
673 soluble EPCR variant. *Thromb Haemost.* 2015;114(5):1038-48.

- 674 37. Barrera V, Hiscott PS, Craig AG, White VA, Milner DA, Beare NA, et al. Severity of  
675 Retinopathy Parallels the Degree of Parasite Sequestration in the Eyes and Brains of  
676 Malawian Children With Fatal Cerebral Malaria. *The Journal of infectious diseases*. 2014.  
677 38. Small DS, Taylor TE, Postels DG, Beare NA, Cheng J, MacCormick IJ, et al. Evidence  
678 from a natural experiment that malaria parasitemia is pathogenic in retinopathy-negative  
679 cerebral malaria. *Elife*. 2017;6.
- 680 39. Liaw PC, Fredenburgh JC, Stafford AR, Tulinsky A, Austin RC, Weitz JI. Localization of  
681 the thrombin-binding domain on prothrombin fragment 2. *The Journal of biological*  
682 *chemistry*. 1998;273(15):8932-9.
- 683 40. O'Regan N, Moxon C, Gegenbauer K, O'Sullivan JM, Chion A, Smith OP, et al. Marked  
684 elevation in plasma osteoprotegerin constitutes an early and consistent feature of cerebral  
685 malaria. *Thromb Haemost*. 2016;115(4):773-80.
- 686 41. Potchen MJ, Kampondeni SD, Seydel KB, Haacke EM, Sinyangwe SS, Mwenechanya  
687 M, et al. 1.5 Tesla Magnetic Resonance Imaging to Investigate Potential Etiologies of Brain  
688 Swelling in Pediatric Cerebral Malaria. *Am J Trop Med Hyg*. 2018;98(2):497-504.
- 689 42. Moxon CA, Zhao L, Li C, Seydel KB, MacCormick IJ, Diggle PJ, et al. Safety of lumbar  
690 puncture in comatose children with clinical features of cerebral malaria. *Neurology*.  
691 2016;87(22):2355-62.
- 692 43. Dou Y, Mizzen CA, Abrams M, Allis CD, Gorovsky MA. Phosphorylation of linker  
693 histone H1 regulates gene expression in vivo by mimicking H1 removal. *Mol Cell*.  
694 1999;4(4):641-7.
- 695 44. Schofield L, Vivas L, Hackett F, Gerold P, Schwarz RT, Tachado S. Neutralizing  
696 monoclonal antibodies to glycosylphosphatidylinositol, the dominant TNF-alpha-inducing  
697 toxin of *Plasmodium falciparum*: prospects for the immunotherapy of severe malaria. *Ann*  
698 *Trop Med Parasitol*. 1993;87(6):617-26.
- 699 45. Mantel PY, Hoang AN, Goldowitz I, Potashnikova D, Hamza B, Vorobjev I, et al.  
700 Malaria-infected erythrocyte-derived microvesicles mediate cellular communication within  
701 the parasite population and with the host immune system. *Cell Host Microbe*.  
702 2013;13(5):521-34.
- 703 46. Chakravorty SJ, Hughes KR, Craig AG. Host response to cytoadherence in  
704 *Plasmodium falciparum*. *Biochem Soc Trans*. 2008;36(Pt 2):221-8.
- 705 47. Tripathi AK, Sullivan DJ, Stins MF. *Plasmodium falciparum*-infected erythrocytes  
706 increase intercellular adhesion molecule 1 expression on brain endothelium through NF-  
707 kappaB. *Infection and immunity*. 2006;74(6):3262-70.
- 708 48. Kessler A, Dankwa S, Bernabeu M, Harawa V, Danziger SA, Duffy F, et al. Linking  
709 EPCR-Binding PfEMP1 to Brain Swelling in Pediatric Cerebral Malaria. *Cell Host Microbe*.  
710 2017;22(5):601-14 e5.
- 711 49. Cunnington AJ, Walther M, Riley EM. Piecing together the puzzle of severe malaria.  
712 *Sci Transl Med*. 2013;5(211):211ps18.
- 713 50. Miller LH, Ackerman HC, Su XZ, Wellems TE. Malaria biology and disease  
714 pathogenesis: insights for new treatments. *Nature medicine*. 2013;19(2):156-67.
- 715 51. Spadoni I, Fornasa G, Rescigno M. Organ-specific protection mediated by  
716 cooperation between vascular and epithelial barriers. *Nat Rev Immunol*. 2017;17(12):761-  
717 73.
- 718 52. Turner L, Lavstsen T, Berger SS, Wang CW, Petersen JE, Avril M, et al. Severe malaria  
719 is associated with parasite binding to endothelial protein C receptor. *Nature*. 2013.

- 720 53. Storm J, Jespersen JS, Seydel KB, Szeszak T, Mbewe M, Chisala NV, et al. Cerebral  
721 malaria is associated with differential cytoadherence to brain endothelial cells. *EMBO Mol*  
722 *Med.* 2019;11(2).
- 723 54. Cheng T, Liu D, Griffin JH, Fernandez JA, Castellino F, Rosen ED, et al. Activated  
724 protein C blocks p53-mediated apoptosis in ischemic human brain endothelium and is  
725 neuroprotective. *Nature medicine.* 2003;9(3):338-42.
- 726 55. Griffin JH, Zlokovic BV, Mosnier LO. Activated protein C, protease activated receptor  
727 1, and neuroprotection. *Blood.* 2018;132(2):159-69.
- 728 56. Gilthorpe JD, Oozer F, Nash J, Calvo M, Bennett DL, Lumsden A, et al. Extracellular  
729 histone H1 is neurotoxic and drives a pro-inflammatory response in microglia. *F1000Res.*  
730 2013;2:148.
- 731 57. Dondorp AM, Desakorn V, Pongtavornpinyo W, Sahassananda D, Silamut K,  
732 Chotivanich K, et al. Estimation of the total parasite biomass in acute falciparum malaria  
733 from plasma PfHRP2. *PLoS medicine.* 2005;2(8):e204.
- 734 58. Hendriksen IC, Mwanga-Amumpaire J, von Seidlein L, Mtove G, White LJ,  
735 Olaosebikan R, et al. Diagnosing severe falciparum malaria in parasitaemic African children:  
736 a prospective evaluation of plasma PfHRP2 measurement. *PLoS medicine.*  
737 2012;9(8):e1001297.
- 738 59. Thakur KT, Vareta J, Carson KA, Kampondeni S, Potchen MJ, Birbeck GL, et al.  
739 Cerebrospinal fluid Plasmodium falciparum histidine-rich protein-2 in pediatric cerebral  
740 malaria. *Malar J.* 2018;17(1):125.
- 741 60. Griffin JH, Zlokovic BV, Mosnier LO. Activated protein C: biased for translation.  
742 *Blood.* 2015;125(19):2898-907.
- 743 61. Cassinelli G, Naggi A. Old and new applications of non-anticoagulant heparin. *Int J*  
744 *Cardiol.* 2016;212 Suppl 1:S14-21.
- 745 62. Telen MJ, Batchvarova M, Shan S, Bovee-Geurts PH, Zennadi R, Leitgeb A, et al.  
746 Sevuparin binds to multiple adhesive ligands and reduces sickle red blood cell-induced vaso-  
747 occlusion. *Br J Haematol.* 2016;175(5):935-48.

748

749 **Acknowledgments:** For recruiting and caring for patients, we would like to thank the nurses  
750 and clinicians on the Paediatric Research Ward team (Malawi–Liverpool–Wellcome Clinical  
751 Research Programme and Blantyre Malaria Project), and the nurses and clinicians in the  
752 Department of Paediatrics and Child Health (Queen Elizabeth Hospital, Blantyre, Malawi).

753 For performing the fibrin-based assays, we would like to thank C. Powell (Roald Dahl  
754 Haemostasis & Thrombosis Centre, Liverpool, U.K.). For histopathology advice we would like  
755 to thank Dan Milner. For technical support with histopathology we would like to thank Qian  
756 Zhen (Program in Dermatopathology, Department of Pathology, Brigham and Women's  
757 Hospital, Boston, U.S.A.). For providing laboratory space and advice we would like to thank  
758 Dyann Wirth. For helpful comments on the manuscript we would like to thank Andy Waters  
759 and Matthias Marti (Wellcome Centre for Integrative Parasitology, University of Glasgow).

760 **Funding:** This work was supported by funding from the Wellcome Trust (to C.A.M) and  
761 Academy of Medical Sciences (to C.A.M.); and a grant from the NIH (T. E. Taylor,  
762 5R01AI034969-14). The Malawi–Liverpool Wellcome Clinical Research Programme is  
763 supported by core funding from The Wellcome Trust (084679/Z/08/Z).

764 **Author contributions:** C.A.M., S.T.A., A.G.C., W.G. and C.H.T., conceived the study and  
765 designed experiments. C.A.M. and S.A. performed analysis. Y.A., S.A., J-Y. K., J.S., J.M.T.\*\*  
766 and C.A.M. performed laboratory experiments. K.B.S. and T.E.T. ran the clinical study and

767 provided clinical and scientific input. M.E.M. provided clinical and scientific input. G.M.,  
768 G.G-C. and J.O. designed experiments and provided scientific and technical input. C.A.M.  
769 wrote the original draft. All authors contributed to critical review and editing of the  
770 manuscript.

771 **Competing interests:** The authors have no conflicting interests.

772

773

774

775

776

777

778

779

780

781

782

783

784

785

786

787

788

789

790

791

792

793

794

795

796

797

798

799

800

801

802

803

804

805

806

807

808

809

810

811

812

813

814 **Figures**

815

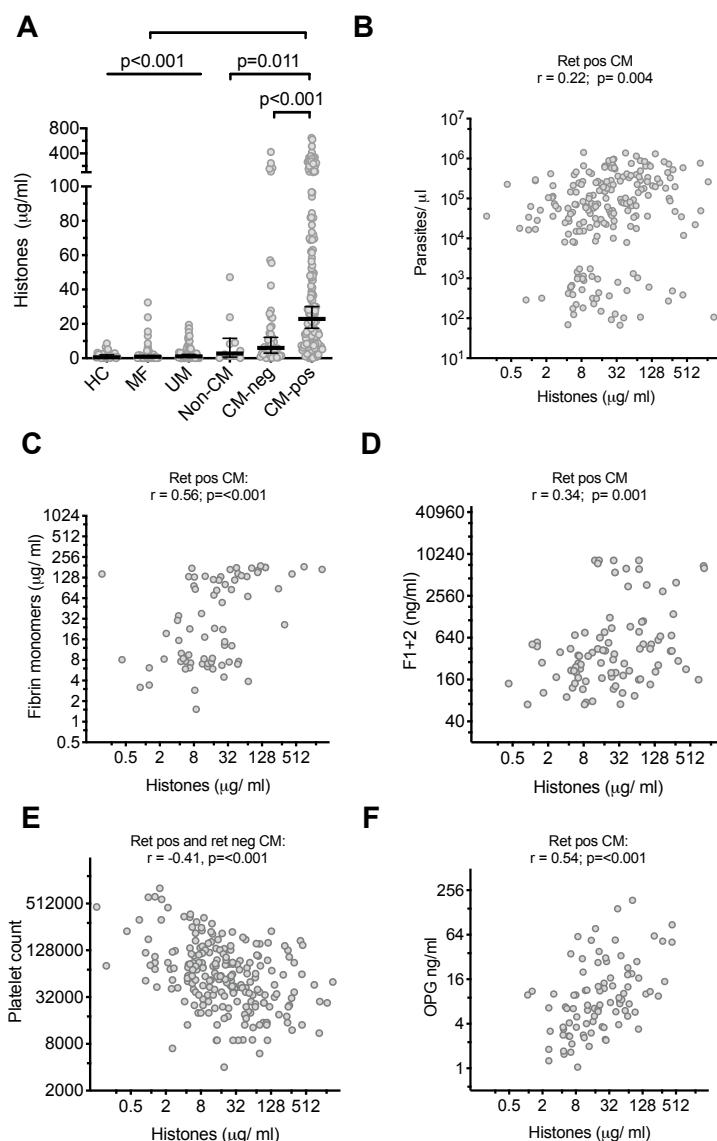

816

817

818

819 **Fig 1. Circulating extracellular histones are elevated in cerebral malaria and correlate with**  
820 **intravascular fibrin generation and with endothelial activation.** Extracellular histone levels  
821 were measured in serum samples taken on admission. (A) The mean concentration of  
822 extracellular histone levels in circulation was significantly higher in retinopathy positive  
823 cerebral malaria cases (CM-pos) than in all other patient groups including retinopathy  
824 negative CM (CM-neg). (B-F) correlations between serum extracellular histone concentration:  
825 peripheral parasite density in children with CM-pos (B); plasma fibrin monomer levels in  
826 children with CM-pos (C); prothrombin fragment F1+2 in children with CM-pos (D); platelet  
827 count among all children with CM (CM-pos and CM-neg) (E); plasma osteoprotegrin (OPG)  
828 concentration in children with CM-pos (F).

829 HC = Healthy control; MF = Mild Febrile illness; UM = uncomplicated malaria; Non-CM  
830 (aparasitaemic children with encephalopathy [in coma] due to a cause other than malaria).

831



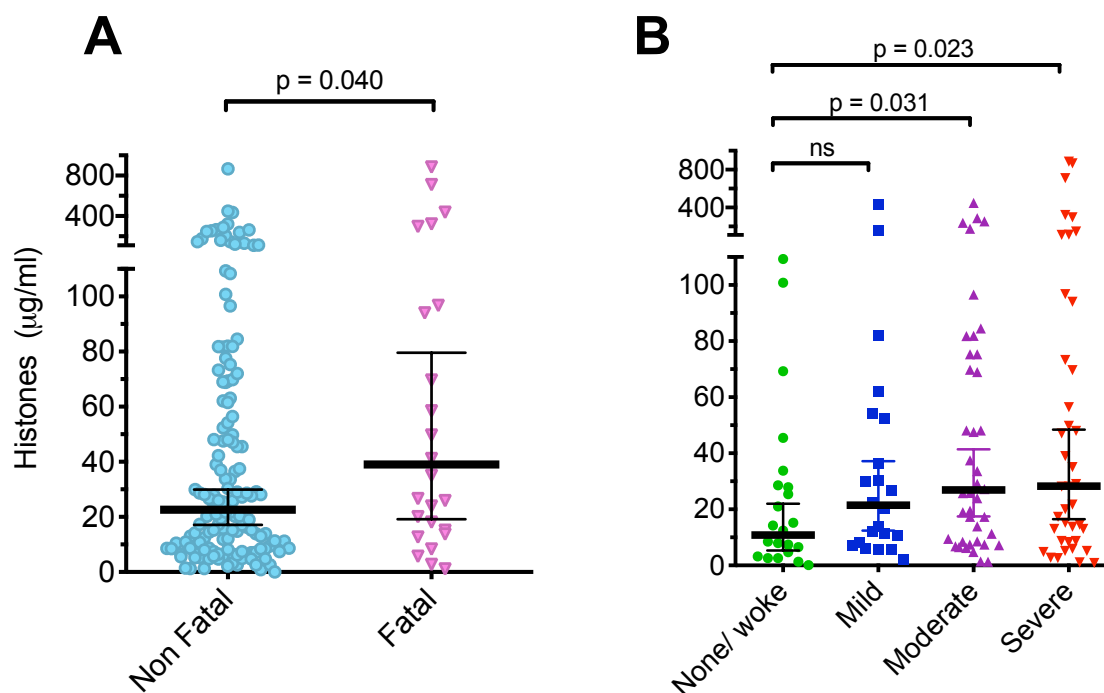

832  
833  
834  
835  
836  
837  
838  
839  
840  
841  
842  
843

**Fig 2. Extracellular histones are associated with fatal outcome and with the degree of brain swelling demonstrated on MRI scan.**

(A) In CM-pos cases, the mean extracellular histone level was higher in children who went on to die (fatal) than in those who survived (non-fatal). (B) Children were categorised by the degree of brain swelling on MRI; circulating histones were higher in children with moderate or severe brain swelling than in those with no evidence of brain swelling.

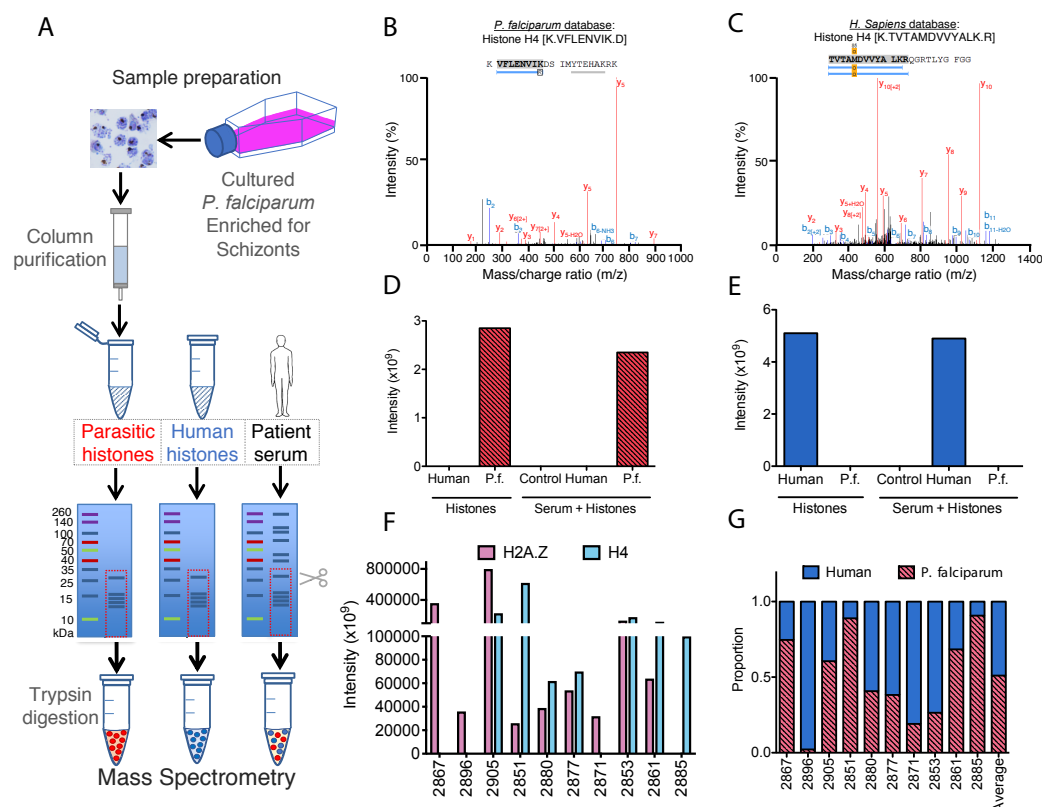

844  
845  
846  
847  
848  
849  
850  
851  
852  
853  
854  
855  
856  
857  
858  
859  
860  
861  
862  
863  
864

**Figure 3. Mass spectrometry analysis of origin of extracellular histones in cerebral malaria cases.** (A) Schematic representation of the methodology used for isolation, purification and mass spectrometry analysis. (B,C) Using Skyline software and by aligning tryptic fragments to reference amino acid sequences we were able to identify specific histone H2A.Z and H4 peptides that were present in purified *P. falciparum* (malarial) preparations, that were not present in purified human histones (H1, H2A, H2B, H3 and H4) and vice versa. Typical peptides are presented from human (B) and malarial (C) database searches. Using Skyline software, we were able to identify histone H4 peptides for each species that demonstrated different Mass/Charge ratios with distinct human and *P. falciparum* peptides and also distinct H2A.Z human and *P. falciparum* peptides (data not shown). (D,E) This enabled us to identify with high specificity and *P. falciparum* (D) and Human (E) species-specific peptides derived from samples spiked into PBS (left) or serum (right); data shown are for H4. (F) In CM-pos patient serum (n=10) we were able to *P. falciparum* histones H2A.Z and H4 in the samples as well as human H2A.Z and H4 (data not shown). (G) We combined the contribution of these two components to estimate the variable proportions of circulating human and *P. falciparum* in the patient serum, demonstrating a significant contribution of *P. falciparum* histones to the total pool.

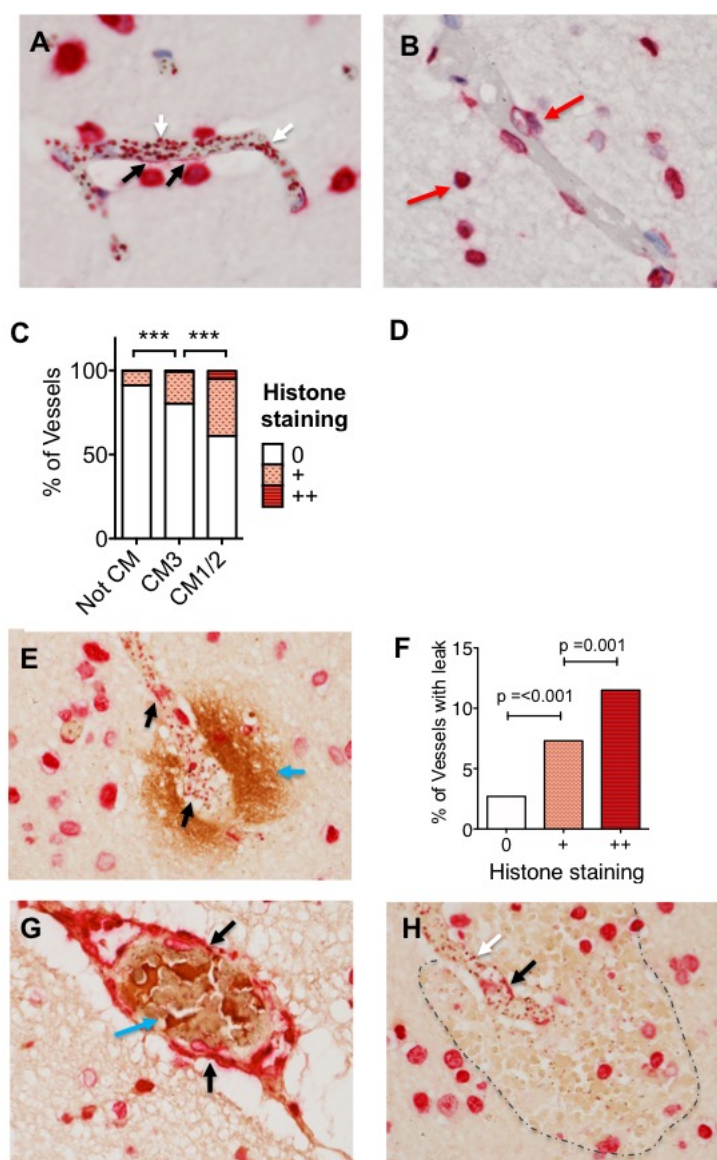

865  
866  
867  
868  
869  
870  
871  
872  
873  
874  
875  
876  
877  
878  
879  
880  
881  
882  
883

**Figure 4. Histones accumulate at the endothelial surface in the cerebral microvasculature, associated with sequestration, coagulopathy and blood brain barrier breakdown.** (A) Cerebral malaria case showing histone staining in close proximity with endothelial cell luminal surface (black arrows) and in both mammalian nuclei and malaria infected red blood cell (IE) nuclei (white arrow); (B) Non-CM case with no histone endothelial membrane binding, histone staining can be seen in mammalian cell nuclei (red arrows); (C) Extracellular histone staining is markedly increased in CM1/2 “true cerebral malaria”; (D) In CM1 and CM2 cases there is a strong association between the degree of sequestration and the presence and strength of histone membrane staining. (E) Histone endothelial membrane staining (black arrows) co-localizing with fibrinogen extravasation (blue arrow), which is indicative of blood brain barrier breakdown. (F) Strong association between the extent of histone endothelial membrane staining and the presence of fibrinogen extravasation. (G) Histone membrane staining (black arrows) co-localizing with thrombosis (blue arrow). (H) Histone membrane staining (black arrow) co-localizing with a ring hemorrhage (edge demarcated by dotted line).

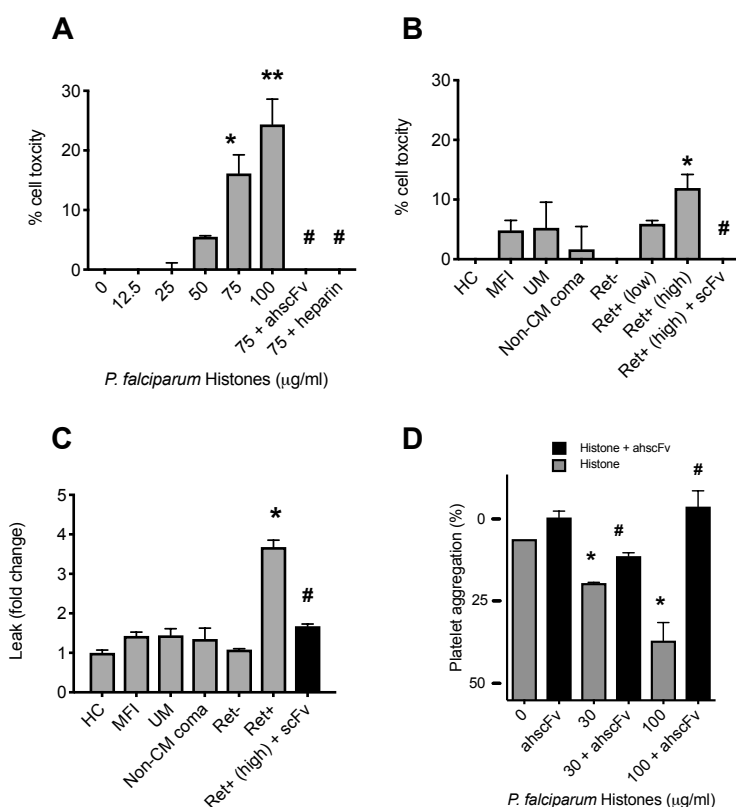

884  
 885 **Figure 5. *P. falciparum* histones induce endothelial cell damage, permeability and platelet**  
 886 **aggregation.** A) HBMECs were treated for 1 hour with medium with or without purified *P.*  
 887 *falciparum* histones (conc) ± anti-histone single-chain Fragment variable (ahscFv) or non-  
 888 anticoagulant heparin. Cell toxicity was determined by propidium iodide staining using flow  
 889 cytometry. Data are expressed relative to cells treated with media alone (set to 0%). ANOVA  
 890 test, \* =  $p < 0.05$  when compared with untreated, # =  $p < 0.05$  when compared with that  
 891 treated with histone alone. B) HBMECs were treated for 1 hour with serum from retinopathy  
 892 positive CM (± ahscFv), uncomplicated malaria, mild non-malarial febrile illness, non-malarial  
 893 encephalopathy or retinopathy negative malaria and healthy controls. Cell toxicity (means ±  
 894 SD) relative to HBMEC treated with serum from healthy control cases (set to 0%) are  
 895 presented. C) Transwell permeability changes of HBMEC monolayer are expressed as fold  
 896 changes in HRP pass through compared to cells treated with normal healthy serum. \*ANOVA  
 897 test shows a significant decrease compared with normal ( $P < 0.05$ ), # $p < 0.05$  when compared  
 898 with retinopathy positive CM alone. D) Platelet rich plasma was incubated with different  
 899 concentrations of *P. falciparum* histones ± ahscFv. Platelet aggregation (%) (means ± SD) are  
 900 presented following 15 mins incubation. ANOVA test, \* $p < 0.05$  when compared with  
 901 untreated, # $p < 0.05$  when compared with that treated with histone alone.

902  
 903  
 904  
 905  
 906

|                                                                           | Healthy controls | Mild febrile illness | Uncomplicated malaria | Non-malarial coma | CM-neg           | CM-pos           |
|---------------------------------------------------------------------------|------------------|----------------------|-----------------------|-------------------|------------------|------------------|
|                                                                           | (n=21)           | (n=34)               | (n=50)                | (n=10)            | (n=48)           | (n=170)          |
| Age - months median (IQR)                                                 | 82 (41-112)      | 41 (23 – 63)         | 63 (40 – 92)          | 46 (32-72)        | 48 (28-67)       | 42 (32-55)       |
| Female sex - no. (%)                                                      | 8 (38)           | 15 (44)              | 26 (52)               | 1 (10)            | 23 (48)          | 86 (50)          |
| HIV positive - no. (%)                                                    | 0 (0)            | 0 (0)                | 0 (0)                 | 0 (0)             | 4 (8.3)          | 15 (8.8)         |
| Axillary temperature - median (IQR):                                      | 36.8 (36.1-36.8) | 38.2 (37.9- 38.6)    | 38.3 (37.9-39.0)      | 38.6 (38.4-39.0)  | 38.7 (37.7-39.6) | 38.7 (38.7-39.6) |
| Pulse rate - beats/ minute - median (IQR):                                | 117 (104-125)    | 136 (113-154)        | 137 (119-147)         | 140 (119-157)     | 143 (130-164)    | 150 (138-167)    |
| Systolic BP - mmHg - median (IQR):                                        | 112 (103-118)    | 117 (107-123)        | 114 (107-122)         | 100 (94-110)      | 98 (91-105)      | 95 (89-106)      |
| Respiratory rate - breaths/ min - median (IQR):                           | 28 (22-32)       | 32 (28-36)           | 27 (24-32)            | 37 (28-40)        | 40 (36-52)       | 44 (38-52)       |
| Blood glucose - mmol/ L - median (IQR):                                   | 5.3 (4.7-5.8)    | 4.8 (4.4-5.4)        | 5.7 (4.9-6.6)         | 7.45 (6.2-8.8)    | 6.7 (5.5-8.6)    | 6.4 (5.3-7.8)    |
| Blood lactate - mmol/ L - median (IQR):                                   | 1.9 (1.8-2.05)   | 1.7 (1.2-2.2)        | 2.4 (1.9-3.0)         | 3.1 (2.1-5.2)     | 4.0 (3.0-7.1)    | 6.4 (3.4-10.3)   |
| Hb - g/ L - median (IQR):                                                 | 104 (98-111)     | 115 (105-120)        | 93 (76-107)           | 91 (82-92)        | 82 (69-102)      | 64 (51-77)       |
| Platelets - $\times 10^9$ / L - median (IQR):                             | 392 (342-474)    | 331 (239-388)        | 132 (82-185)          | 335 (176-462)     | 133 (57-221)     | 50 (27-84)       |
| Peripheral parasite density ( $\times 10^3/\mu\text{l}$ ) - median (IQR): | 0                | 0                    | 31 (0.7-32)           | 0                 | 48 (5-173)       | 75 (17-273)      |
| Serum Histones - $\mu\text{g}/\text{mL}$ - median (IQR):                  | 1.3 (0.0 – 3.0)  | 0.8 (0.0 – 3.8)      | 1.5 (0.4 – 5.6)       | 3.2 (1.0 – 12.7)  | 6.3 (2.2-23.5)   | 24.6 (8.4-69.4)  |

907  
908  
909  
910  
911  
912  
913  
914  
915  
916  
917  
918  
919  
920  
921  
922  
923  
924  
925  
926  
927  
928  
929

**Table 1.** *Clinical characteristics of the children.* IQR - interquartile range; HIV - Human Immunodeficiency Virus; Hb - Hemoglobin.

930 **Supplementary Material**

931

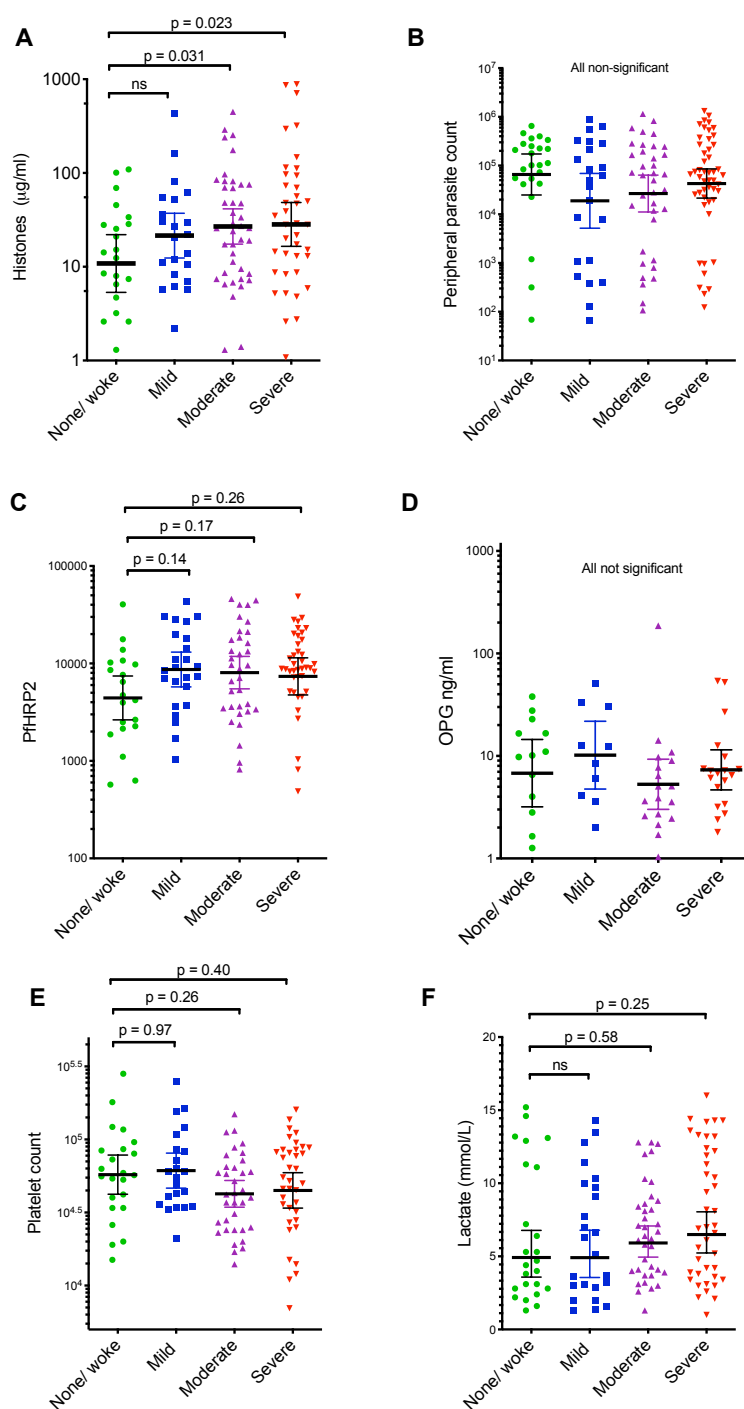

932

933 **Fig S1.** Histones but not other laboratory factors are associated with the degree of brain

934 swelling in CM-pos patients. PfHRP2 = *P. falciparum* histidine rich protein 2; OPG =

935 osteoprotegrin

936

937

938

939



940

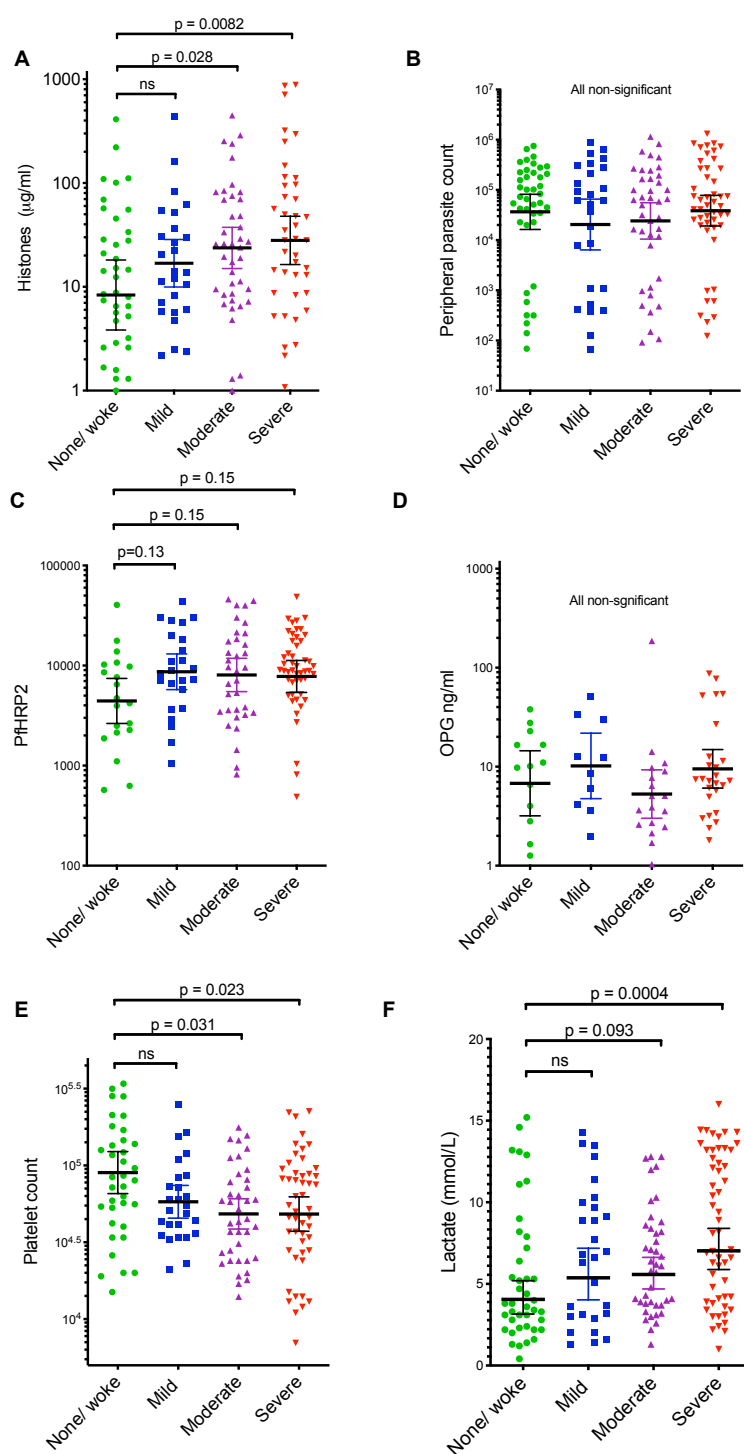

941

942

**Fig S2.** When both CM-pos and CM-neg cases are included, histones platelet count and lactate are associated with the degree of brain swelling.

943

944

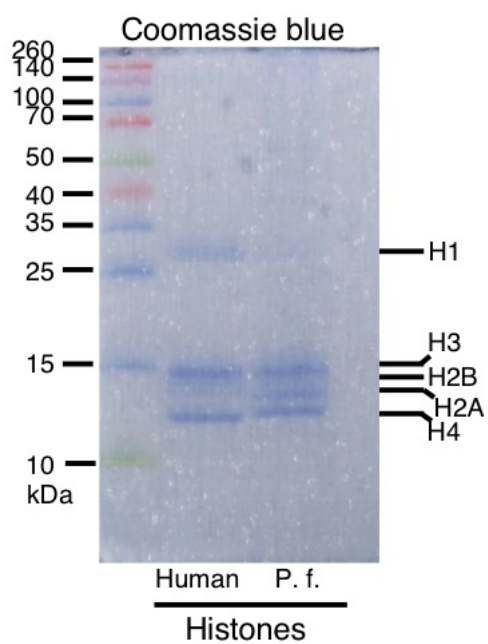

945  
946  
947  
948  
949  
950  
951  
952  
953

**Fig. S3. Gel showing purified Plasmodium falciparum (P. f.) and human histones.** Different core histones (H2A, H2B, H3, H4) are identified by size.

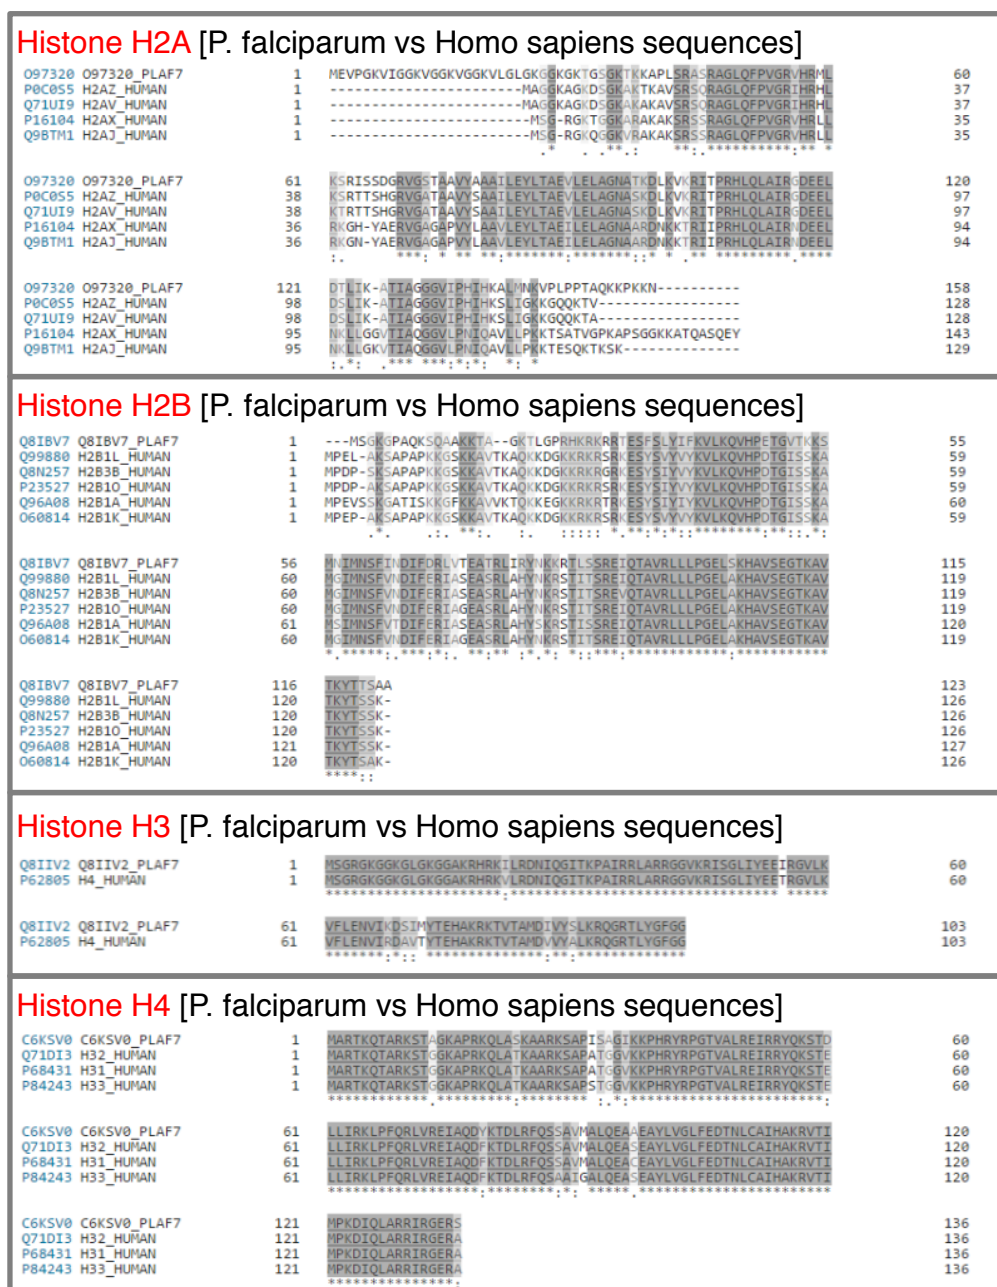

954  
955

956 **Fig. S4** Alignment of *Homo sapiens* and *P. falciparum* histones. Amino acid sequences of  
957 individual histone variant proteins (H2A, H2B, H3 and H4) were compared between *Homo*  
958 *sapiens* and *P. falciparum*. Using these data, we were able to identify heterologous (species-  
959 specific) histone peptide sequences (including protein ID numbers) for further downstream  
960 analysis. Dark grey = homologous amino acids; light grey and clear = heterologous amino  
961 acids.

962  
963  
964

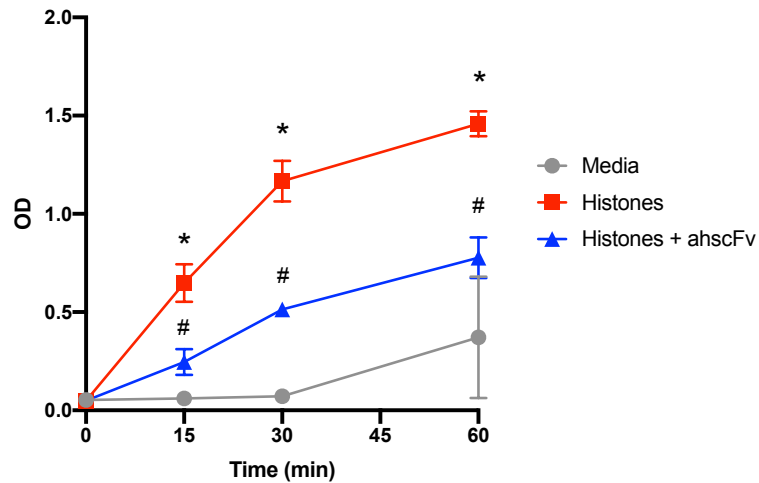

965  
966

967 **Fig S5.** Time-course of barrier disruption of Primary human brain microvascular endothelial  
968 cells (HBMEC) by *P. falciparum* histones in a dual chamber system. Histone concentration  
969 100µg/ml; Antibody concentration 200µg/ml. \* = significant difference from media alone; #  
970 = significant difference from histone alone (i.e. significant protection by ahscFv).

971  
972  
973  
974  
975  
976  
977  
978  
979  
980  
981  
982  
983  
984  
985  
986  
987  
988  
989  
990  
991  
992  
993  
994  
995  
996

| Autopsy Number | Classification | Diagnosis                                      | % Vessels with High Seq. | % Vessels with Strong Histone staining | % Vessels with Leak |
|----------------|----------------|------------------------------------------------|--------------------------|----------------------------------------|---------------------|
| 74             | CM1            | Cerebral malaria                               | 67.1                     | 17.1                                   | 2.86                |
| 79             | CM1            | Cerebral malaria                               | 73.3                     | 6.7                                    | 2.1                 |
| 84             | CM1            | Cerebral malaria                               | 60                       | 0                                      | 0                   |
| 97             | CM1            | Cerebral malaria                               | 82.9                     | 4.3                                    | 1.4                 |
| 100            | CM1            | Cerebral malaria                               | 3.33                     | 0                                      | 0                   |
| 60             | CM2            | Cerebral malaria                               | 55.7                     | 1.4                                    | 1.4                 |
| 62             | CM2            | Cerebral malaria                               | 65.2                     | 0                                      | 1.4                 |
| 63             | CM2            | Cerebral malaria                               | 83                       | 1.4                                    | 7.1                 |
| 64             | CM2            | Cerebral malaria                               | 85.6                     | 2.2                                    | 3.3                 |
| 66             | CM2            | Cerebral malaria                               | 4.3                      | 0                                      | 1.4                 |
| 68             | CM2            | Cerebral malaria                               | 75.7                     | 0                                      | 1.4                 |
| 75             | CM2            | Cerebral malaria                               | 82.9                     | 24.3                                   | 1.4                 |
| 78             | CM2            | Cerebral malaria                               | 22.3                     | 5.7                                    | 13.3                |
| 101            | CM2            | Cerebral malaria                               | 21.4                     | 10                                     | 2.1                 |
| 102            | CM2            | Cerebral malaria                               | 47.8                     | 1.1                                    | 14.4                |
| 43             | CM3            | Giant cell myocarditis                         | 0                        | 0                                      | 5.6                 |
| 49             | CM3            | Ruptured Arteriovenous malformation            | 0                        | 4.4                                    | 1.4                 |
| 54             | CM3            | Skull fracture                                 | 0                        | 0                                      | 10                  |
| 71             | CM3            | Subdural/intracerebral hematomas               | 0                        | 0                                      | 4.4                 |
| 92             | CM3            | Left ventricular failure with pulmonary oedema | 0                        | 0                                      | 0                   |
| 93             | CM3            | Clinical CM; Diagnosis uncertain               | 0                        | 0                                      | 0                   |
| 44             | Non-CM         | Salicylate toxicity - suspected                | 0                        | 1.4                                    | 4.4                 |
| 46             | Non-CM         | Severe (non-malarial) anemia                   | 0                        | 0                                      | 0                   |
| 59             | Non-CM         | Reye's syndrome                                | 0                        | 0                                      | 1.4                 |
| 65             | Non-CM         | Reye's syndrome                                | 0                        | 0                                      | 0                   |
| 88             | Non-CM         | Subdural hematoma, head trauma                 | 0                        | 0                                      | 0                   |

1034

1035 **Table S1. Summary of post-mortem cases.** Clinical pathologist's diagnosis at autopsy and  
 1036 proportion of vessels with each of: (1) high sequestration (seq; sequestration involving >50%  
 1037 of vessel lumen); (2) strong histone staining and; (3) leak (fibrinogen staining adjacent to a  
 1038 vessel).

1039

1040

1041

1042
